# Supplementary material
Source: publisher figshare collection journal article supplement (https://adisjournals.figshare.com/ndownloader/files/37894110)
Supplement: Supplementary file 1 [file 37894110]

## Ripretinib: Adis Evaluation

### Clinical Considerations

- Is the only approved fourth-line treatment for advanced GIST in the USA and EU
- Inhibits a broad spectrum of KIT and PDGFRA mutants
- Improves progression-free survival in the fourth-line setting
- Acceptable tolerability; the most common drug-related adverse events are alopecia, myalgia and nausea

### Plain Language Summary

#### *Background and rationale*

- The receptor tyrosine kinases KIT and platelet-derived growth factor receptor  $\alpha$  (PDGFRA) regulate cell growth and survival; mutations in the genes of these proteins are the most common causes of gastrointestinal stromal tumours
- Drugs that target kinases are a mainstay in the treatment of these cancers; however, new mutations often occur that make tumours resistant to kinase inhibitors
- Ripretinib (Qinlock®) is approved for patients with gastrointestinal stromal tumours after the tumour has become resistant to three or more other kinase inhibitors

#### *Clinical findings*

- In a pivotal phase III clinical trial in patients with gastrointestinal stromal tumours and who had failure with three or more prior treatments, ripretinib significantly delayed disease progression compared with placebo
- Ripretinib has an acceptable side effect profile, with the most common drug-related side effects being alopecia, muscle pain and nausea

#### *Conclusion*

Ripretinib is a valuable treatment option in the management of advanced gastrointestinal stromal tumours

This plain language summary represents the opinions of the authors. For a full list of declarations, including funding and author disclosure statements, and copyright information, please see the full text online. © Springer Nature Switzerland AG 2022.
